# Supplementary material
Source: publisher figshare collection journal article supplement (https://springernature.figshare.com/ndownloader/files/32584299)
Supplement: Supplementary file 1 [file 32584299]

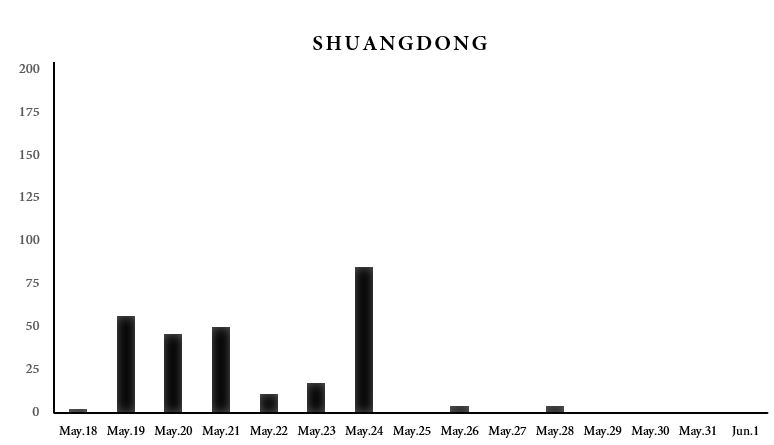


Figure S1. Two-week daily precipitation prior to the ML6.5 2013 Nantou earthquake at the weather station of Shuangdong near the epicenter.
